# Supplementary material for: Psychological Interventions Prior to Cancer Surgery: a Review of Reviews
Source: Springer Nature journal article supplement (doi:10.1007/s40140-021-00505-x), 2022-01-31
Supplement: MOESM1 [file 20084474]

**Table S1: Overview of psychological intervention types [54]**

|                           | Number of papers with psychological intervention / Total papers | Education |                 |                       |                            | Cognitive-behavioral |                            |                                     |                 |               | Relaxation        |                |                     |                               |                      | Supportive Counseling |               |                                |                            |                               |
|---------------------------|-----------------------------------------------------------------|-----------|-----------------|-----------------------|----------------------------|----------------------|----------------------------|-------------------------------------|-----------------|---------------|-------------------|----------------|---------------------|-------------------------------|----------------------|-----------------------|---------------|--------------------------------|----------------------------|-------------------------------|
|                           |                                                                 | Education | Psychoeducation | Information provision | Stress management training | CBT (not specified)  | Modified sleep restriction | Stress management (CBT orientation) | Problem-solving | Coping skills | Anxiety reduction | Guided imagery | Relaxation training | Progressive muscle relaxation | Breathing techniques | Meditation            | Psychotherapy | Health professional discussion | Counseling (not specified) | Supportive expressive therapy |
| Boereboom et al. (2016)   | 2/8                                                             |           |                 |                       |                            |                      |                            |                                     |                 |               |                   |                |                     |                               |                      |                       |               |                                |                            |                               |
| Bolshinsky et al. (2018)  | 2/20                                                            |           |                 |                       |                            |                      |                            |                                     |                 |               |                   |                |                     |                               |                      |                       |               |                                |                            |                               |
| Bruns et al. (2016)       | 2/6                                                             |           |                 |                       |                            |                      |                            |                                     |                 |               |                   |                |                     |                               |                      |                       |               |                                |                            |                               |
| Chen et al. (2018)        | 8/8                                                             |           |                 |                       |                            | ✓                    | ✓                          | ✓                                   | ✓               | ✓             | ✓                 | ✓              | ✓                   | ✓                             |                      | ✓                     |               |                                | ✓                          |                               |
| Chou et al. (2018)        | 4/12                                                            |           | ✓               |                       | ✓                          |                      |                            |                                     |                 | ✓             | ✓                 | ✓              |                     |                               |                      |                       |               |                                |                            |                               |
| Daniels et al. (2020)     | 6/52                                                            |           | ✓               | ✓                     |                            |                      |                            |                                     |                 | ✓             | ✓                 | ✓              |                     |                               |                      | ✓                     |               |                                |                            |                               |
| Fitzgerald et al. (2016)  | 21/21                                                           |           |                 | ✓                     |                            |                      |                            |                                     |                 |               |                   |                |                     |                               |                      |                       |               | ✓                              |                            |                               |
| Garcia et al. (2016)      | 2/14                                                            | ✓         |                 |                       |                            |                      |                            |                                     |                 |               |                   | ✓              |                     |                               |                      |                       |               |                                |                            |                               |
| Hijazi et al. (2017)      | 2/9                                                             |           |                 |                       |                            |                      |                            |                                     |                 |               |                   |                |                     |                               |                      |                       |               |                                |                            |                               |
| Pouwels et al. (2015)     | 2/11                                                            |           |                 |                       |                            |                      |                            |                                     |                 |               |                   |                |                     | ✓                             |                      |                       |               |                                |                            |                               |
| Rosero et al. (2019)      | 2/10                                                            |           | ✓               |                       | ✓                          |                      |                            |                                     |                 |               |                   |                |                     |                               |                      |                       |               |                                |                            |                               |
| Schneider et al. (2020)   | 5/15                                                            |           | ✓               |                       |                            |                      |                            |                                     |                 |               |                   |                |                     |                               |                      | ✓                     |               |                                |                            |                               |
| Steffens et al. (2018)    | 2/17                                                            |           |                 |                       |                            |                      |                            |                                     |                 |               |                   |                |                     | ✓                             |                      |                       |               |                                |                            |                               |
| Treanor et al. (2018)     | 6/18                                                            |           | ✓               |                       | ✓                          |                      |                            |                                     |                 |               |                   | ✓              |                     |                               |                      | ✓                     |               |                                |                            | ✓                             |
| Tsimopoulou et al. (2015) | 7/7                                                             | ✓         | ✓               |                       | ✓                          |                      |                            |                                     | ✓               | ✓             | ✓                 |                |                     |                               | ✓                    | ✓                     | ✓             |                                |                            | ✓                             |
| Vermillion et al. (2018)  | 2/9                                                             |           |                 |                       |                            |                      |                            |                                     |                 |               |                   |                |                     |                               |                      |                       |               |                                |                            |                               |

**Education:** information or education about cancer, treatment, and/or physical side effects; **Psycho-education:** information or education about emotional impact of cancer and stress management, excludes cognitive-behavioral approaches. **Cognitive-behavioural:** working with cognitions, challenging negative thoughts, refocusing thoughts onto positive; goal-setting and problem-solving or behavioral maintenance. **Supportive counseling:** counseling or therapy offered as part of the intervention, excludes cognitive-behavioral approaches; **Health professional discussion:** discussion with a health professional (excludes counseling/psychotherapy, routine/standard care). *Abbreviations:* CBT, cognitive behavioral therapy
